# Supplementary material
Source: PubMed Central journal article supplement (PMC4746098)
Supplement: NIHMS721365-supplement-1.pdf [file NIHMS721365-supplement-1.pdf]

**Fig. S1**

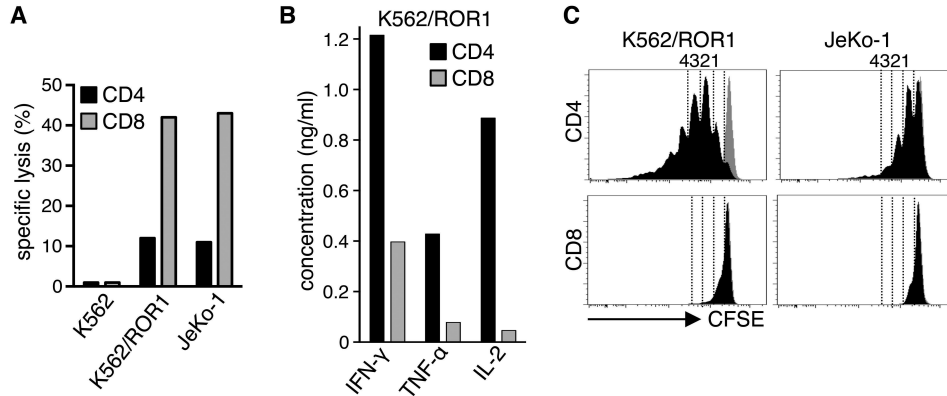

**Figure S1: CD4<sup>+</sup> and CD8<sup>+</sup> ROR1-CAR-T-cells differ in effector function.** (A) Cytolytic activity of ROR1 CAR-T-cells against ROR1<sup>+</sup> (K562/ROR1, JeKo-1) and control (K562) target cells at an E:T ratio of 30:1 analyzed by a standard 4 h chromium release assay. (B) Cytokine production by ROR1-CAR-T-cells after co-culture with K562/ROR1 cells for 24 h. (C) Proliferation of ROR1 CAR-T-cells after stimulation with K562/ROR1 and JeKo-1 cells for 72 h. Stimulation with K562 cells is shown as a comparison in each histogram (gray graph). Data are representative of two independent experiments with T-cells prepared from different donors. Analysis of normalized values for cytokine production from purified CD4<sup>+</sup> and CD8<sup>+</sup> T-cells stimulated with K562/ROR1 or JeKo-1 cells showed that CD4<sup>+</sup> T-cells produced significantly greater IFN- $\gamma$ , TNF- $\alpha$ , and IL-2 than CD8<sup>+</sup> T-cells.
