# Supplementary material
Source: PubMed Central journal article supplement (PMC4746098)
Supplement: NIHMS721365-supplement-2.pdf [file NIHMS721365-supplement-2.pdf]

**Fig. S2**

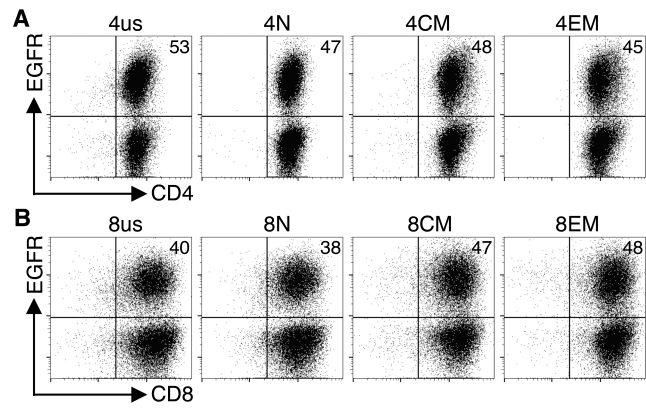

**Figure S2: Transduction efficiency in CD4<sup>+</sup> and CD8<sup>+</sup> T-cell subsets.** Analysis of EGFRt expression on (A) CD4<sup>+</sup> and (B) CD8<sup>+</sup> T-cells transduced with a CD19 CAR-EGFRt construct.
